# Supplementary material for: E-cigarette flavored pods induce inflammation, epithelial barrier dysfunction, and DNA damage in lung epithelial cells and monocytes
Source: PubMed Central journal article supplement (PMC6910911; doi:10.1038/s41598-019-51643-6), 2019-12-13
Supplement: 41598_2019_51643_MOESM1_ESM.pdf [file 41598_2019_51643_MOESM1_ESM.pdf]

## **Supplementary Information**

### **E-cigarette flavored pods induce inflammation, epithelial barrier dysfunction, and DNA damage in lung epithelial cells and monocytes**

\*Thivanka Muthumalage, \*Thomas Lamb, Michelle R. Friedman, and Irfan Rahman

\*These authors contributed equally to this work

**Supplementary Table S1:** Chemical composition of JUUL pod flavors, Fruit Medley, Classic Menthol, Cool Mint, Crème Brulee, Cool Cucumber, Mango, and Virginia Tobacco, presented in retention time and percent probability in parenthesis

| Chemical Compound                                                    | CAS#        | Fruit Medley | Classic Menthol | Cool Mint    | Crème brulee | Cool Cucumber | Mango        | Virginia Tobacco |
|----------------------------------------------------------------------|-------------|--------------|-----------------|--------------|--------------|---------------|--------------|------------------|
| heptaethylene glycol                                                 | 5617-32-3   |              |                 |              |              | 5.318 (14.7)  | 5.324 (15.1) |                  |
| butanedioic acid, 2,3-dimethoxy-, diethyl ester                      | 53431-90-6  | 5.336 (19.1) |                 | 5.330 (11.4) | 5.324 (16.2) |               |              | 5.324 (10.5)     |
| butanoic acid, 4-(1,1-dimethylethoxy)-3-hydroxy-, methyl ester, (R)  | 133-32-4    | 5.582 (26.9) |                 |              |              |               |              |                  |
| sulfide, sec-butyl isopropyl-                                        | 22438-36-4  |              |                 |              | 5.662 (15.9) |               |              |                  |
| sorbitol                                                             | 50-70-4     |              |                 |              |              |               | 5.736 (10.2) |                  |
| 3-ethoxy-1,2-propanediol                                             | 1874-62-0   |              |                 |              | 5.851 (22.4) |               |              |                  |
| benzyl alcohol                                                       | 100-51-6    |              |                 | 5.925 (44.7) |              |               |              |                  |
| 2-propanol, 1,1'-oxybis-                                             | 110-98-5    | 5.994 (49.4) |                 |              |              | 5.873 (49.7)  |              |                  |
| cis-beta-terpineol                                                   | 7299-41-4   |              |                 | 6.125 (22.8) |              |               |              |                  |
| <b>cyclohexanol, 1-methyl-4-(1-methylethyl)-(MENTHOL DERIVATIVE)</b> | 21129-27-1  | 6.823 (15.1) | 6.812 (17.4)    |              |              | 6.812 (14.6)  |              |                  |
| benzoic acid                                                         | 65-85-0     | 7.298 (45.1) | 6.932 (31.1)    | 7.087 (41.9) | 7.012 (38.7) | 7.075 (45.9)  | 6.921 (38.1) | 6.966 (45.7)     |
| glycerin                                                             | 247035-47-8 | 7.911 (85.5) | 6.440 (85.4)    | 6.686 (82.7) | 6.697 (73.8) | 6.440 (85.5)  | 6.509 (75.1) | 6.589 (73.0)     |
|                                                                      |             |              | 7.041 (84.3)    |              |              | 7.458 (83.7)  | 6.995 (84.3) | 7.138 (83.2)     |
| menthol *                                                            | 89-78-1     | 6.823 (12.2) | 6.812 (12.6)    | 6.823 (11.3) | NO           | 6.812 (10.3)  | NO           | NO               |
| desulphosinigrin                                                     | 5115-81-1   |              |                 |              |              |               | 7.956 (20.0) | 9.541 (8.07)     |

| Chemical Compound                                               | CAS#       | Fruit Medley  | Classic Menthol | Cool Mint    | Crème brulee  | Cool Cucumber | Mango         | Virginia Tobacco |
|-----------------------------------------------------------------|------------|---------------|-----------------|--------------|---------------|---------------|---------------|------------------|
| 1,2,3-propanetriol, diacetate                                   | 102-62-5   |               |                 | 8.031 (67.5) |               |               |               |                  |
| <b>pyridine, 3-(1-methyl-2-pyrrolidinyl)-, (S) - (NICOTINE)</b> | 54-11-5    | 8.300 (80.3)  | 8.219 (81.0)    |              | 8.237 (81.4)  | 8.254 (80.8)  | 8.220 (79.6)  | 8.236 (80.5)     |
| vanillin                                                        | 121-33-5   |               |                 |              | 8.569 (67.3)  |               |               |                  |
| 2(3H)-furanone, 5-hexyldihydro-                                 | 706-14-9   | 9.026 (39.7)  |                 |              |               |               |               |                  |
| benzaldehyde, 3,4-dimethoxy-                                    | 120-14-9   |               |                 | 9.547 (24.4) | 9.290 (75.3)  |               |               | 9.066 (79.4)     |
| pyridine, 3-(2-piperidinyl)-, (S)-                              | 494-52-0   | 10.285 (32.2) |                 |              |               |               |               |                  |
| DL-xylitol, 1-benzoate                                          | 13078-04-1 | 10.629 (14.3) |                 |              |               |               |               |                  |
| benzoic acid, hexadecyl ester                                   | 22485-54-7 |               |                 |              | 11.372 (8.19) |               |               |                  |
| benzoic acid, pentadecyl ester                                  | 56954-74-6 |               |                 |              | 11.401 (8.06) |               |               | 11.372 (11.5)    |
|                                                                 |            |               |                 |              |               |               |               | 11.401 (14.2)    |
| hexadecanoic acid, methyl ester                                 | 112-39-0   |               |                 |              | 11.452 (53.9) | 11.447 (69.8) | 11.447 (74.7) | 11.452 (72.6)    |
|                                                                 |            |               |                 |              |               | 12.276 (69.8) |               |                  |
| terephthalic acid, 2-nitro-5-sulfonyl-                          | 30211-77-9 |               |                 |              | 11.533 (9.18) |               |               |                  |
| 9-octadecenoic acid (Z)-, methyl ester                          | 112-62-9   | 12.196 (7.90) |                 |              |               |               |               |                  |
| 10-octadecenoic acid, methyl ester                              | 13481-95-3 | 12.225 (12.7) |                 |              | 12.191 (8.27) |               |               | 12.196 (6.57)    |
| octadecanoic acid, methyl ester                                 | 112-61-8   | 12.282 (67.4) |                 |              | 12.276 (46.7) |               | 12.276 (58.0) | 12.282 (52.9)    |

| Chemical Compound                           | CAS#       | Fruit Medley | Classic Menthol | Cool Mint | Crème brulee  | Cool Cucumber | Mango         | Virginia Tobacco |
|---------------------------------------------|------------|--------------|-----------------|-----------|---------------|---------------|---------------|------------------|
| phenol, 2,4-bis(1,1-dimethylethyl)-         | 96-76-4    |              |                 |           |               |               |               | 9.255 (22.6)     |
| benzene, 4-(dimethoxymethyl)-1,2-dimethoxy- | 59276-33-4 |              |                 |           |               |               |               | 9.598 (79.4)     |
| 2(3H)-furanone, 5-heptyldihydro-            | 104-67-6   |              |                 |           |               |               | 9.690 (78.5)  |                  |
| ethyl citrate                               | 77-93-0    |              |                 |           |               |               | 10.148 (89.8) | 10.153 (93.7)    |
| octadecane, 3-ethyl-5-(2-ethylbutyl)-       | 55282-12-7 |              |                 |           |               |               |               | 10.428 (6.68)    |
| heptacosane                                 | 593-49-7   |              |                 |           |               |               |               | 10.651 (6.76)    |
| tetradecane, 2,6,10-trimethyl               | 14905-56-7 |              |                 |           |               |               |               | 10.743 (11.5)    |
| diphenyl sulfone                            | 127-63-9   |              |                 |           |               |               |               | 11.618 (45.8)    |
| heptacosane                                 | 593-49-7   |              |                 |           |               |               |               | 11.647 (8.96)    |
| squalene                                    | 111-02-4   |              |                 |           | 15.675 (16.9) |               |               |                  |

**Supplementary  
Figure 1**

**A: Internal structure of a JUUL pod**

A JUUL pod consists of a stainless steel vapor path, a silica wick, and a nichrome coil heater enclosed in heat resistant plastic and pod covers. (Authors took JUUL pods apart themselves and took pictures)

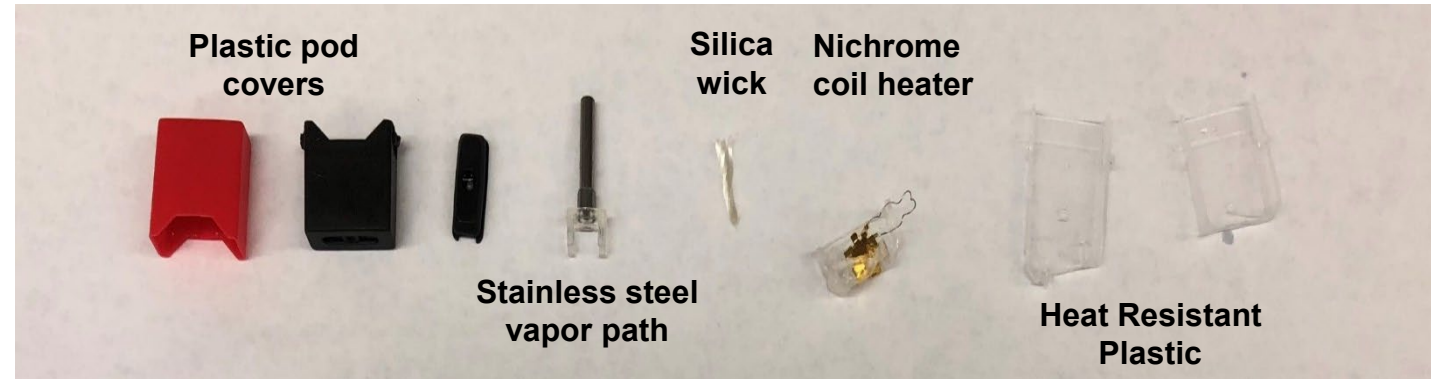

**B. In-vitro exposure setup**

JUUL pod device connected to Scireq Inexpose pump delivering three puffs/min, with 55 mL puff volume over 22 minutes (66 total puffs), to the EnzyScreen chamber containing cell culture plates. Cells were allowed an additional 8 minutes in the chamber with a cumulative 30-minutes during a single aerosol exposure session.

(The authors have drawn this schematic by themselves)

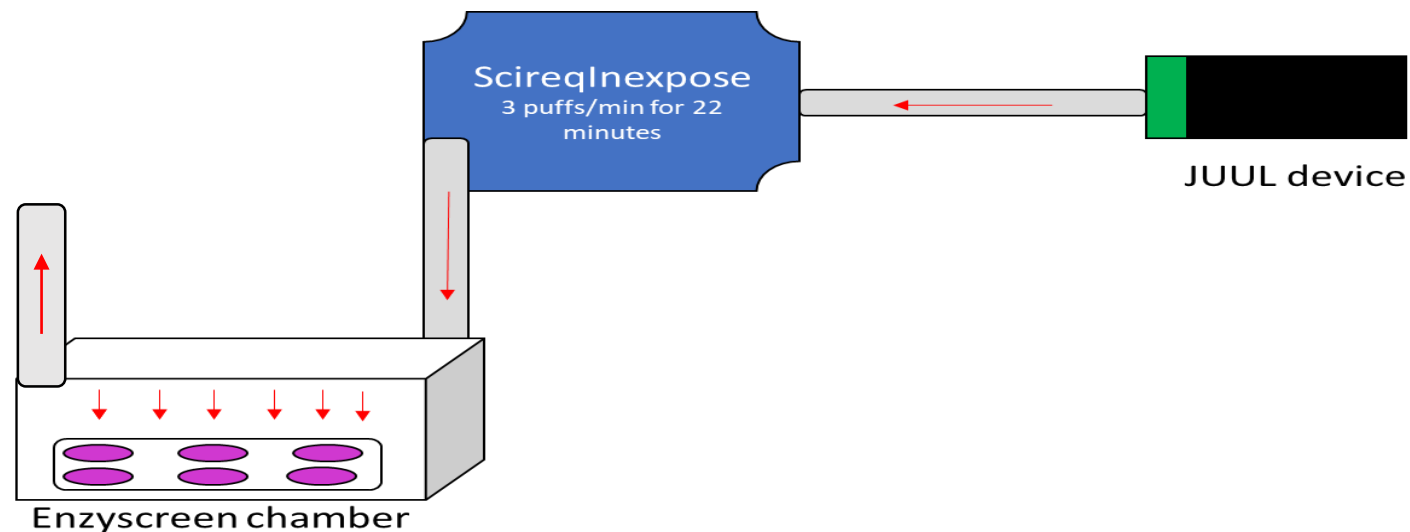

## Supplementary Figure 2: Acellular glutathione reduction by JUUL aerosols

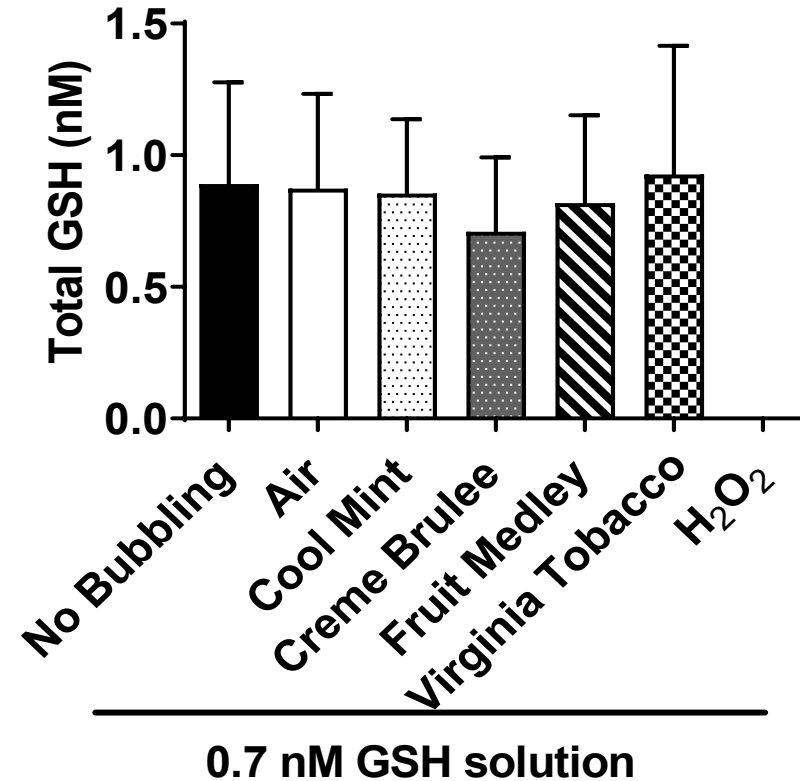

### JUUL pod does not affect acellular total glutathione levels

Fifteen puffs of Cool Mint, Crème Brulee, Fruit Medley, and Virginia Tobacco pod flavors were bubbled through 0.7 nM glutathione solution using Scireq Inexpose system with a three-second puff duration. For control comparison control groups, H<sub>2</sub>O<sub>2</sub> (30%) was used as the positive control while DCF-dye alone air-bubbled as negative controls.
